# Supplementary material for: MIXv2: a long-term mosaic emission inventory for Asia (2010–2017)
Source: Copernicus journal article supplement (doi:10.5194/egusphere-2023-2283), 2023-12-08
Supplement: Supplementary file [file egusphere-2023-2283-AC3-supplement.pdf]

## **Response to comments of “MIXv2: a long-term mosaic emission inventory for Asia (2010-2017)” - #3**

This paper is a welcomed update of the MIX emission inventories developed within the MICS-Asia framework. This is a great example of an inclusive and collaborative effort that brings together emission experts from various countries in Asia and combines best available country level information to produce an Asia wide consistent set of emissions. This current work extends this inventory in time from 2010 to 2017 and increases the spatial resolution (from 25 km to 10 km). These are significant advancements. This new inventory will support many modeling and analysis studies.

The previous inventory has been widely used and been a great contribution to air quality studies in Asia. However, there was a clear need to update in time the inventory to support further studies as emissions in this region continue to change rapidly over time.

The paper is well written and presents sufficient details to understand the methodologies used. It also presents useful information regarding the trends in species and sectors in various parts of Asia.

A significant contribution.

**Response:** We greatly appreciate the recognition of the reviewer. We hope the updated emission inventory can support more air quality studies in Asia. Thanks for the comment.
